# Supplementary material for: Socio-economic position, area-level deprivation and gradients in cancer incidence: England and Wales, 1971–2016
Source: Springer Nature journal article supplement (doi:10.1186/s12889-025-21875-5), 2025-02-24
Supplement: MOESM1 [file 12889_2025_21875_MOESM1_ESM.pdf]

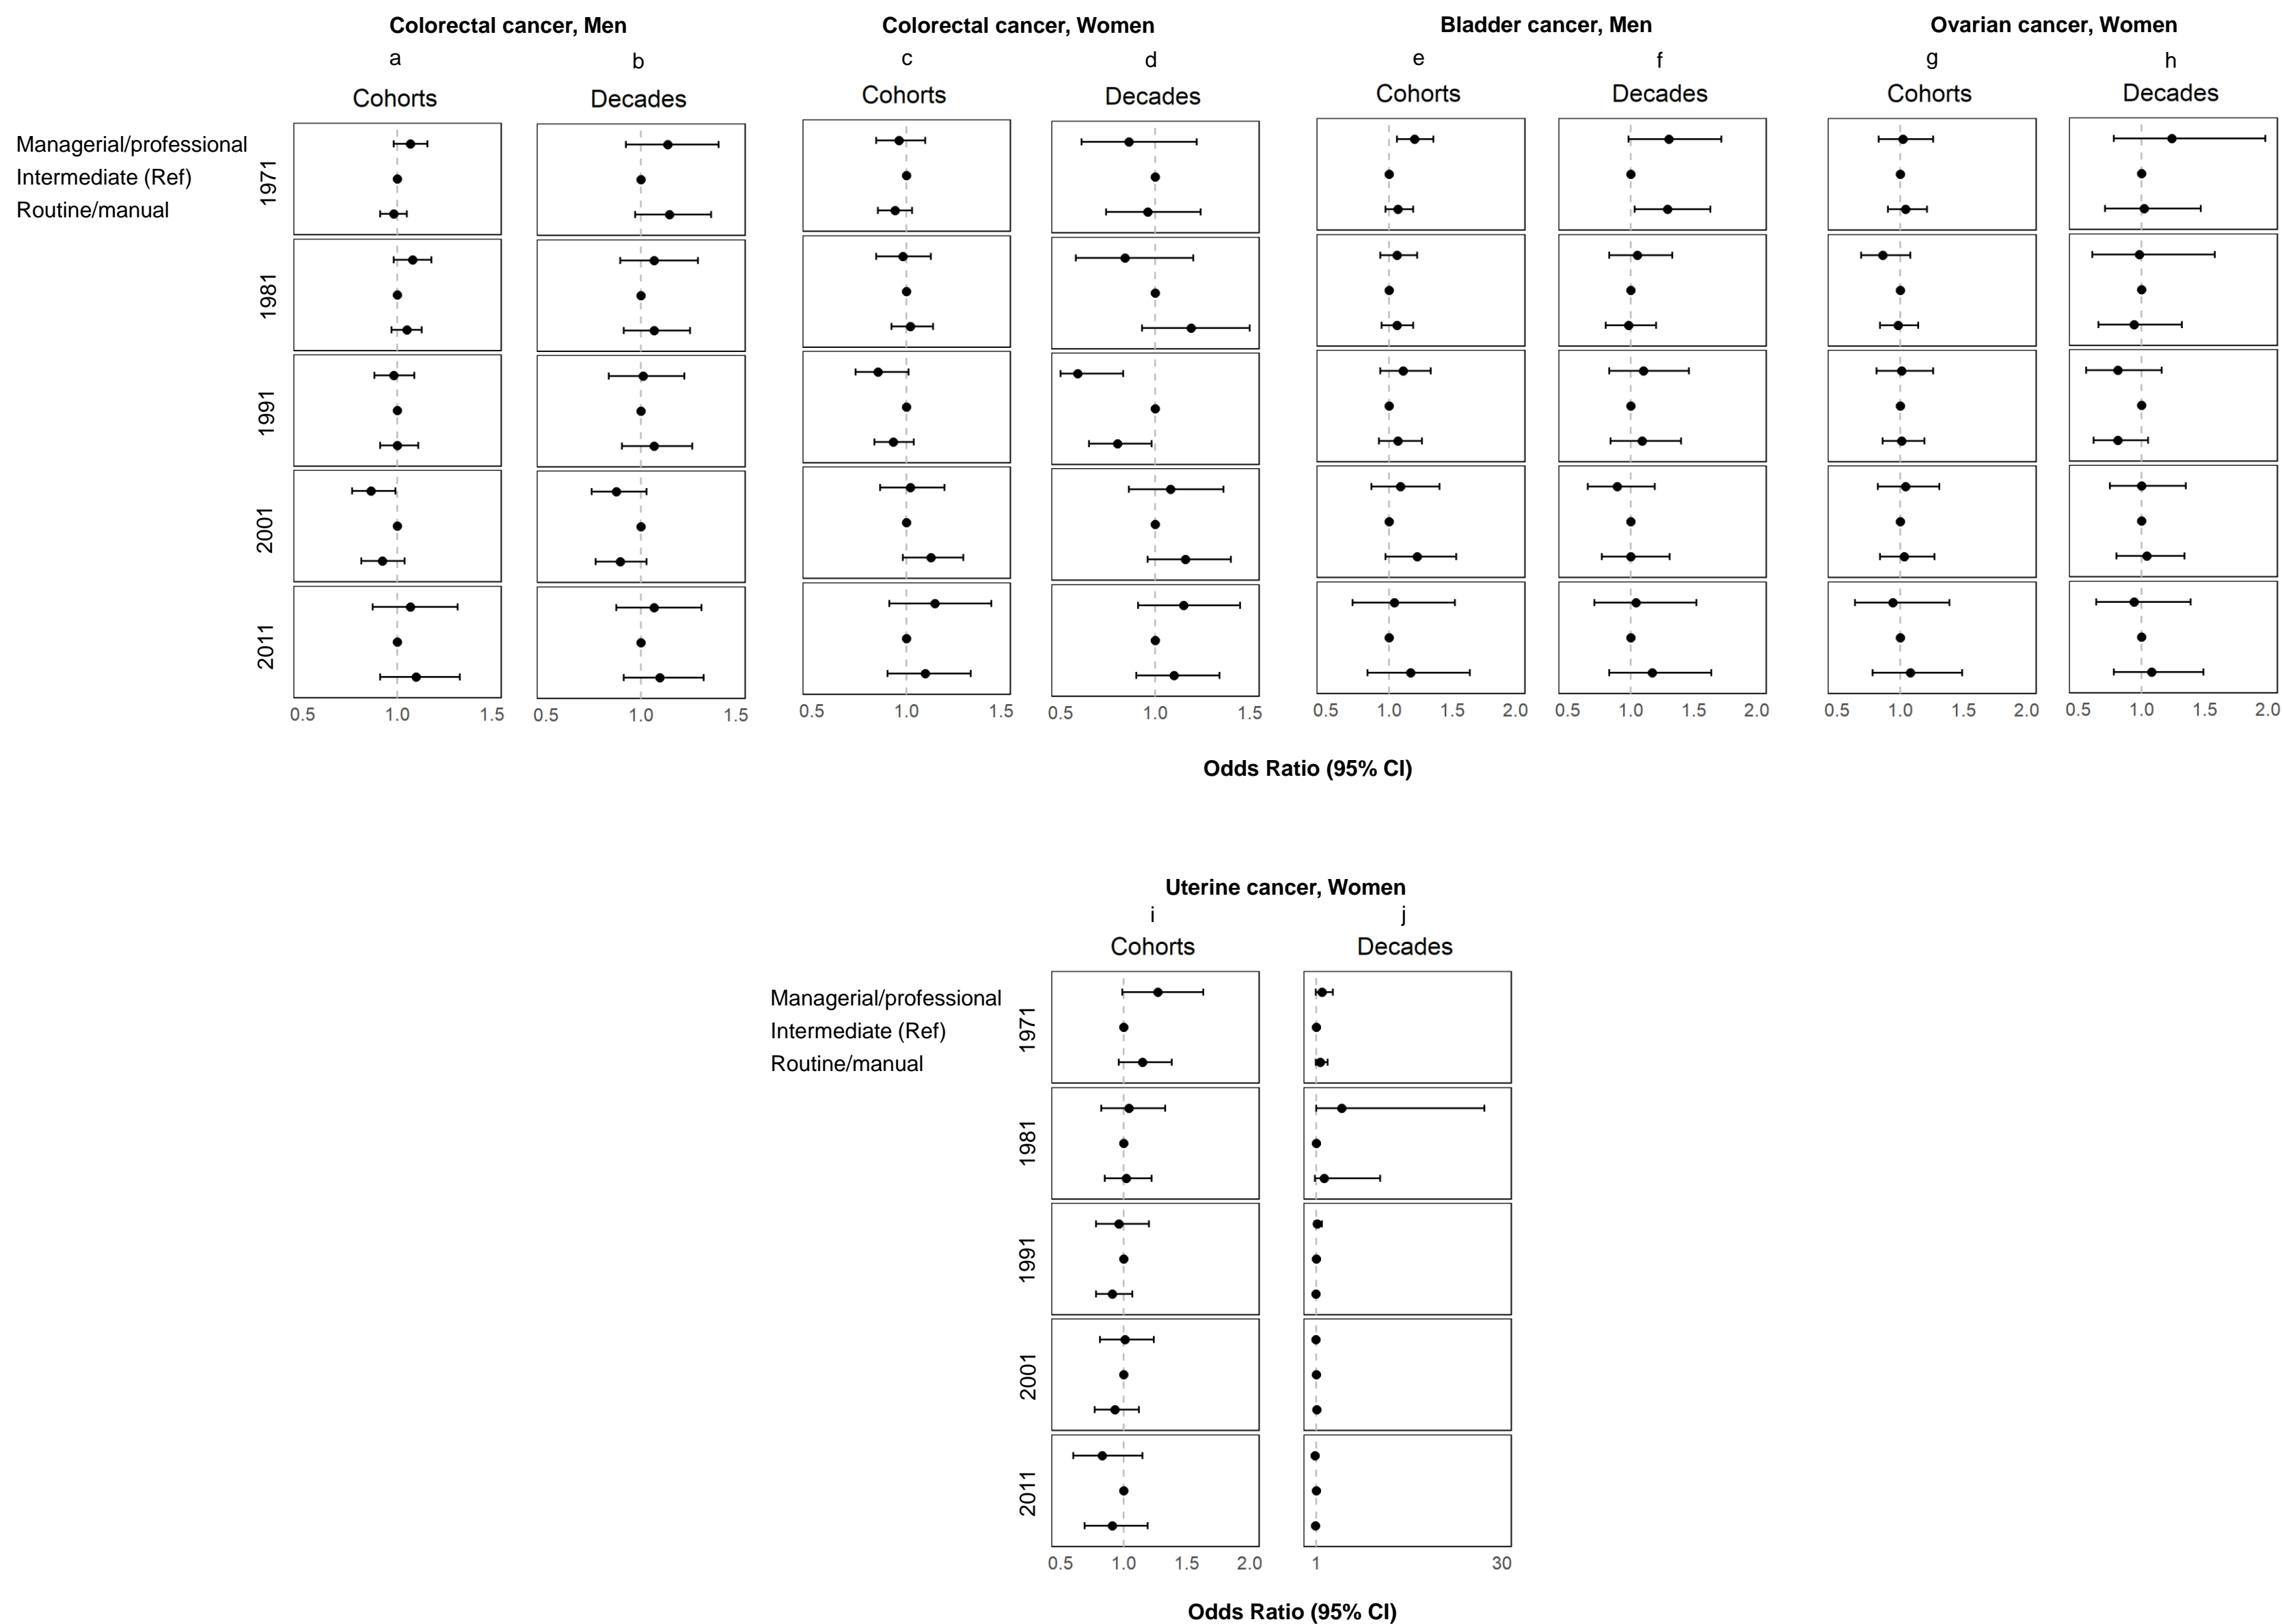

Supplemental Figure 1. Cancer incidence in the Office for National Statistics Longitudinal Study (ONS-LS) according to the National Statistics Socio-economic classification (NS-SEC), 1971-2016. Cancer sites: Colon and rectum for men and women (Panels a-d), Bladder in men (Panels e-f), Ovary (Panels g-h), and Uterus (Panels i-j). Analyses were adjusted for age, education level, marital status and country of birth group.
